# Supplementary material for: The genome of Alcaligenes aquatilis strain BU33N: Insights into hydrocarbon degradation capacity
Source: PubMed Central journal article supplement (PMC6759156; doi:10.1371/journal.pone.0221574), 2019-09-24
Supplement: pone.0221574.s001.pdf [file pone.0221574.s001.pdf]

**S1 Table.** 16 rRNA genes similarity of BUN33 strain ( CP022390.1) and all type strains of the genus *Alcaligenes* using MAFFT

| <b>Type strain</b> | <b>AB920 828.1</b> | <b>AJ2429 86.1</b> | <b>AJ937 889.1</b> | <b>CP02 2390.1</b> | <b>CP0 3215 3.2</b> | <b>CP03 2153.1</b> | <b>CP032 153.3</b> | <b>KR96 7368.1</b> | <b>D880 08.1</b> | <b>AY296 718.1</b> | <b>U9692 7.1</b> |
|--------------------|--------------------|--------------------|--------------------|--------------------|---------------------|--------------------|--------------------|--------------------|------------------|--------------------|------------------|
| <b>AB920 828.1</b> | 100                | 98.71              | 98.08              | 98.65              | 98.65               | 98.79              | 98.65              | 97.16              | 98.15            | 96.88              | 88.52            |
| <b>AJ242 986.1</b> | 98.71              | 100                | 99.71              | 99.79              | 99.79               | 99.65              | 99.5               | 98.3               | 98.65            | 97.31              | 89.05            |
| <b>AJ937 889.1</b> | 98.08              | 99.71              | 100                | 99.91              | 99.91               | 99.72              | 99.54              | 97.97              | 98.5             | 97.19              | 87.39            |
| <b>CP022 390.1</b> | 98.65              | 99.79              | 99.91              | 100                | 100                 | 99.87              | 99.74              | 98.36              | 98.84            | 96.84              | 89.54            |
| <b>CP032 153.2</b> | 98.65              | 99.79              | 99.91              | 100                | 100                 | 99.87              | 99.74              | 98.36              | 98.84            | 96.84              | 89.54            |
| <b>CP032 153.1</b> | 98.79              | 99.65              | 99.72              | 99.87              | 99.87               | 100                | 99.87              | 98.23              | 98.71            | 96.71              | 89.67            |
| <b>CP032 153.3</b> | 98.65              | 99.5               | 99.54              | 99.74              | 99.74               | 99.87              | 100                | 98.1               | 98.57            | 96.57              | 89.81            |
| <b>KR967 368.1</b> | 97.16              | 98.3               | 97.97              | 98.36              | 98.36               | 98.23              | 98.1               | 100                | 97.41            | 95.56              | 88.87            |
| <b>D8800 8.1</b>   | 98.15              | 98.65              | 98.5               | 98.84              | 98.84               | 98.71              | 98.57              | 97.41              | 100              | 97.34              | 88.75            |
| <b>AY296 718.1</b> | 96.88              | 97.31              | 97.19              | 96.84              | 96.84               | 96.71              | 96.57              | 95.56              | 97.34            | 100                | 87.11            |
| <b>U9692 7.1</b>   | 88.52              | 89.05              | 87.39              | 89.54              | 89.54               | 89.67              | 89.81              | 88.87              | 88.75            | 87.11              | 100              |
