# Supplementary material for: The genome of Alcaligenes aquatilis strain BU33N: Insights into hydrocarbon degradation capacity
Source: PubMed Central journal article supplement (PMC6759156; doi:10.1371/journal.pone.0221574), 2019-09-24
Supplement: pone.0221574.s003.pdf [file pone.0221574.s003.pdf]

**S3 Table.** Key enzymes encoded in the *Alcaligenes aquatilis* BU33N genome associated with aromatic hydrocarbon degradation and biosurfactant synthesis from Rast and Eggnog annotation.

| <b>Pathway</b>              | <b>Protein/Enzyme</b>                                          | <b>EC number</b> |
|-----------------------------|----------------------------------------------------------------|------------------|
| <b>Benzoate degradation</b> | benzoate 1, 2-dioxygenase alpha subunit                        | EC 1.14.12.10    |
|                             | benzoate 1, 2-dioxygenase beta subunit                         | EC 1.14.12.10    |
|                             | Ortho-halobenzoate 1, 2-dioxygenase OhbA & OhbB                |                  |
|                             | 1, 2-dihydroxycyclohexa-3, 5-diene-1-carboxylate dehydrogenase | EC 1.3.1.25      |
|                             | 4-hydroxybenzoate transporter                                  |                  |
|                             | P-hydroxybenzoate hydroxylase                                  | EC 1.14.13.2     |
|                             | Ring hydroxylating dioxygenase, alpha subunit                  | EC 1.14.12.13    |
|                             | 4-carboxymuconolactone decarboxylase                           | EC 4.1.1.44      |
|                             | 3-polyprenyl-4-hydroxybenzoate carboxy-lyase UbiX              | EC 4.1.1.-       |
|                             | 3-polyprenyl-4-hydroxybenzoate carboxy-lyase                   | EC 4.1.1.-       |
|                             | 4-hydroxybenzoate polyprenyltransferase                        | EC 2.5.1.39      |
|                             | 4-carboxymuconolactone decarboxylase                           | EC 4.1.1.44      |
|                             | Glutaryl-CoA dehydrogenase                                     | EC 1.3.99.7      |
|                             | Protocatechuate 4,5-dioxygenase                                | EC:1.13.11.3     |
|                             | protocatechuate 4,5-dioxygenase subunit alpha                  | EC:1.13.11.3     |

---

|                                 |                                                                 |               |
|---------------------------------|-----------------------------------------------------------------|---------------|
|                                 | enoyl-CoA hydratase                                             | EC:4.2.1.17   |
| <b>Catechol</b>                 | catechol 1, 2-dioxygenase                                       | EC 1.13.11.1  |
|                                 | muconatecycloisomerase                                          | EC 5.5.1.1    |
|                                 | muconolactone isomerase                                         | EC 5.3.3.4    |
|                                 | beta-ketoadipate enol-lactone hydrolase                         | EC 3.1.1.24   |
|                                 | 3-oxoadipate CoA-transferase subunit A                          | EC 2.8.3.6    |
|                                 | 3-oxoadipate CoA-transferase subunit B                          | EC 2.8.3.6    |
|                                 | beta-ketoadipyl CoA thiolase                                    | EC 2.3.1.-    |
| <b>Phenanthrene/Ketoadipate</b> | Ring hydroxylating dioxygenase, alpha subunit                   | EC 1.14.12.13 |
|                                 | 3-phenylpropionate dioxygenase beta subunit                     | EC 1.14.1.-   |
|                                 | 1,2-dihydroxycyclohexa-3,5-diene-1-carboxylate<br>dehydrogenase | EC 1.3.1.25   |
|                                 | Biphenyl-2,3-diol 1,2-dioxygenase                               | EC 1.13.11.39 |
|                                 | Maleylacetoacetate isomerase                                    | EC 5.2.1.2    |
|                                 | Possible carboxymuconolactone decarboxylase family<br>protein   | EC 4.1.1.44   |
|                                 | 4-hydroxy-2-oxovalerate aldolase                                | EC 4.1.3.39   |
|                                 | 4-carboxymuconolactone decarboxylase                            | EC 4.1.1.44   |
|                                 | Acetaldehyde dehydrogenase                                      | (EC 1.2.1.10) |
|                                 | Acetaldehyde dehydrogenase, acetylating,                        | EC 1.2.1.10   |

---

---

|                           |                                                     |               |
|---------------------------|-----------------------------------------------------|---------------|
|                           | carboxymuconolactone decarboxylase                  |               |
|                           | Aldehyde dehydrogenase                              | EC 1.2.1.3    |
|                           | Benzoate 1,2-dioxygenase beta subunit               | EC 1.14.12.10 |
|                           | Benzoate 1,2-dioxygenase alpha subunit              | EC 1.14.12.10 |
|                           | Muconate cycloisomerase                             | EC 5.5.1.1    |
|                           | Homogentisate 1,2-dioxygenase                       | EC 1.13.11.5  |
|                           | Ortho-halobenzoate 1,2-dioxygenase OhbA             |               |
|                           | Ortho-halobenzoate 1,2-dioxygenase OhbB             |               |
|                           | Muconate cycloisomerase                             | EC 5.5.1.1    |
|                           | carboxymuconolactone decarboxylase                  |               |
|                           | Beta-ketoadipate enol-lactone hydrolase             | EC 3.1.1.24   |
| <b>Dioxin degradation</b> | Acetaldehyde dehydrogenase                          | EC 1.2.1.10   |
|                           | 2-keto-4-pentenoate hydratase                       | EC 4.2.1.80   |
|                           | Alcohol dehydrogenase                               | EC 1.1.1.1    |
|                           | Biphenyl-2,3-diol 1,2-dioxygenase                   | EC 1.13.11.39 |
|                           | 2-hydroxy-6-oxo-6-phenylhexa-2,4-dienoate hydrolase | EC 3.7.1      |
|                           | 2-keto-4-pentenoate hydratase                       | EC 4.2.1.80   |
|                           | Acetaldehyde dehydrogenase, acetylating             | EC 1.2.1.10   |
|                           | 4-hydroxy-2-oxovalerate aldolase                    | EC 4.1.3.39   |

---

---

|                                            |                                                  |              |
|--------------------------------------------|--------------------------------------------------|--------------|
|                                            | 2-keto-4-pentenoate hydratase                    | EC 4.2.1.80  |
|                                            | Salicylate hydroxylase                           | EC 1.14.13.1 |
|                                            | 4-hydroxy-2-oxovalerate aldolase                 | EC4.1.3.39   |
| <b>Salicylate and gentisate catabolism</b> | Salicylate hydroxylase                           | EC 1.14.13.1 |
|                                            | Fumarylacetoacetase                              | EC 3.7.1.2   |
|                                            | Maleate cis-trans isomerase                      | EC 5.2.1.1   |
|                                            | Gentisate 1,2-dioxygenase                        | EC 1.13.11.4 |
|                                            | salicylate esterase                              |              |
|                                            | Homogentisate 1,2-dioxygenase                    | EC 1.13.11.5 |
|                                            | Fumarylacetoacetase                              | EC 3.7.1.2   |
| <b>Phenol hydroxylase,</b>                 | Phenol hydroxylase, assembly protein DmpK        |              |
|                                            | Phenol hydroxylase, P1 oxygenase component DmpL  | EC 1.14.13.7 |
|                                            | Phenol hydroxylase, P2 regulatory component DmpM | EC 1.14.13.7 |
|                                            | Phenol hydroxylase, FAD- and [2Fe-2S]            |              |
|                                            | Phenol hydroxylase, P3 oxygenase component DmpN  | EC 1.14.13.7 |
|                                            | Phenol hydroxylase, P4 oxygenase component DmpO  | EC 1.14.13.7 |
| <b>Biosurfactant synthesis</b>             | dTDP-4-dehydrorhamnose 3,5-epimerase             | EC 5.1.3.13  |
|                                            | 3-oxoacyl-[acyl-carrier protein] reductase       | EC 1.1.1.100 |
|                                            | Malonyl CoA-ACP transacylase                     | EC 2.3.1.39  |

---

---

peptidoglycan glycosyltransferase

EC 2.4.1.129

Phosphomannomutase

EC 5.4.2.8

Aspartokinase

EC 5.2.1.1

---
